# Supplementary material
Source: publisher figshare collection journal article supplement (https://acs.figshare.com/ndownloader/files/11488916)
Supplement: Supplementary file 1 [file 11488916]

59
	Energy: -933467.1541712
C          0.15496       -0.35176       -0.55632
C         -3.72989       -2.40317       -0.62917
C         -1.47089       -3.06516        1.54189
C         -1.67917       -1.87034        0.79692
C         -2.65471       -1.59231       -0.16844
C         -1.20577        2.04605        0.42343
C          1.66400       -0.30395       -0.49404
C         -3.58846        0.31090       -1.45500
C         -2.47710       -0.26170       -0.72821
C         -0.07532       -0.70240        2.25719
C         -0.00172       -1.82777        3.02680
C         -4.70284       -1.85137       -1.41931
C         -0.83689       -0.70816        1.02822
C          2.20899       -1.64010        0.06985
H          1.80429       -1.82040        1.06888
H          1.86227       -2.46033       -0.57407
C          3.70618        0.88680        0.40356
H          4.03697        1.72239        1.03275
C         -4.65955       -0.46547       -1.78354
C          3.74386       -1.61080        0.11818
H          4.10212       -2.55607        0.54456
C          2.25137       -0.12890       -1.91827
H          1.89912       -0.94925       -2.56073
H          1.87792        0.80921       -2.35152
C         -1.45759        2.51027        1.72402
H         -1.69110        1.79302        2.50843
C          4.26701        1.05358       -1.01531
H          3.93064        2.00786       -1.44248
H          5.36473        1.07710       -0.98823
C          2.16938        0.88623        0.35618
H          1.79761        1.82299       -0.08010
H          1.77527        0.83003        1.37284
C          4.20239       -0.43942        1.00151
H          3.80866       -0.56267        2.01982
H          5.29825       -0.43020        1.07480
C         -0.91724        3.00208       -0.56084
H         -0.70019        2.67662       -1.57834
C          3.78743       -0.11516       -1.88803
H          4.16104        0.00767       -2.91232
B         -1.29504        0.49808        0.13084
C         -0.63962       -3.04636        2.62948
C          4.30290       -1.43672       -1.30055
H          5.40106       -1.43474       -1.27900
H          3.99114       -2.27895       -1.93298
C         -1.13458        4.80224        1.03311
H         -1.10432        5.86251        1.26792
C         -1.42290        3.87046        2.02929
H         -1.62170        4.20325        3.04445
C         -0.88387        4.36438       -0.26680
H         -0.65703        5.08320       -1.04954
P         -0.82666       -0.22006       -1.88866
H         -3.81091       -3.43571       -0.29832
H         -5.54656       -2.45484       -1.74116
H         -5.49395       -0.03784       -2.33190
H         -3.54266        1.35632       -1.75398
H         -2.01477       -3.97003        1.28044
H         -0.50210       -3.94046        3.23017
H          0.38623        0.21758        2.60231
H          0.54098       -1.79955        3.96819
